# Supplementary material for: Bacillamide F, Extracted from Marine Bacillus atrophaeus C89, Preliminary Effects on Leukemia Cell Lines
Source: MDPI journal article supplement (doi:10.3390/biology11121712), 2022-11-25
Supplement: s1 [file s1]

**Table S2.** IC<sub>50</sub> values of bacillamide F on different cancer cell lines.

|          | IC <sub>50</sub> (μM) 24 h | IC <sub>50</sub> (μM) 48 h | IC <sub>50</sub> (μM)72 h |
|----------|----------------------------|----------------------------|---------------------------|
| HL60     | 21.82 ± 2.1                | 14.13 ± 1.9                | 9.44 ± 1.6                |
| Jurkat   | 46.9 ± 2.6                 | 37.16 ± 2.8                | 33.09 ± 2.3               |
| MRC-5    | >100                       | N.D.                       | N.D.                      |
| PATU8988 | >100                       | N.D.                       | N.D.                      |
| SW 1990  | >100                       | N.D.                       | N.D.                      |
| U937     | >100                       | >100                       | >100                      |

N.D.= not determine.
