# Supplementary material for: Bacillamide F, Extracted from Marine Bacillus atrophaeus C89, Preliminary Effects on Leukemia Cell Lines
Source: MDPI journal article supplement (doi:10.3390/biology11121712), 2022-11-25
Supplement: s1 [file s1]

**Table S1.** <sup>1</sup>H and <sup>13</sup>C NMR (600 and 150 MHz in methanol-d<sub>4</sub>) data for compound 1.

| No. | δ <sub>c</sub> , Type  | δ <sub>H</sub> (J in Hz) |
|-----|------------------------|--------------------------|
| 1   | 123.57, CH             | 7.10, s                  |
| 2   | 113.04, C              |                          |
| 3   | 119.37, CH             | 7.58, d (7.60)           |
| 4   | 119.65, CH             | 6.97, t (7.20)           |
| 5   | 122.38, CH             | 7.07, m                  |
| 6   | 112.24, CH             | 7.32, d (8.00)           |
| 7   | 138.20, C              |                          |
| 8   | 128.77, C              |                          |
| 9   | 26.27, CH <sub>2</sub> | 3.05, t (7.20)           |
| 10  | 41.30, CH <sub>2</sub> | 3.68, t (7.20)           |
| 11  | 163.35, C              |                          |
| 12  | 150.55, C              |                          |
| 13  | 124.37, CH             | 8.03, s                  |
| 14  | 174.38, C=O            |                          |
| 15  | 59.66, CH              | 5.32, dd<br>(2.80, 7.60) |
| 16  | 33.02, CH <sub>2</sub> | 2.23, m                  |
| 17  | 25.12, CH <sub>2</sub> | 2.03, m                  |
| 18  | 49.12, CH <sub>2</sub> | 3.71~3.58, m             |
| 19  | 172.64, C=O            |                          |
| 20  | 22.32, CH <sub>3</sub> | 2.09, s                  |
